# Supplementary material
Source: Springer Nature journal article supplement (https://www.springermedizin.de/resource/supplementary/12959_2014_226_MOESM5_ESM.pdf/9569300)

### A) Effect of age on major bleeding for VKA

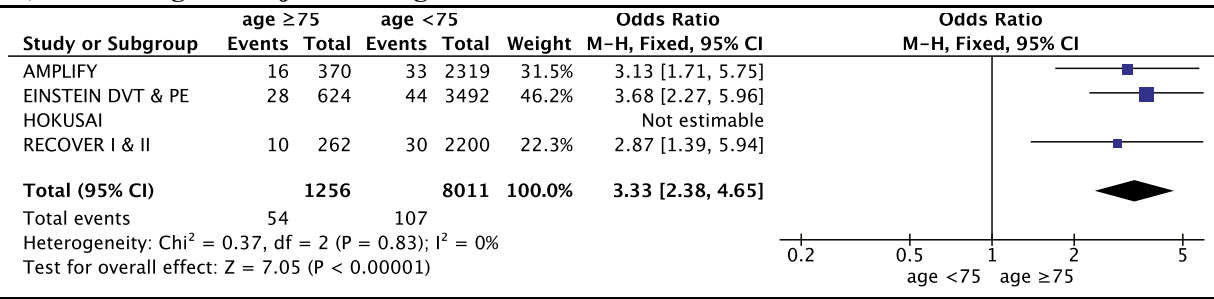

### B) Effect of age on major bleeding for NOACs

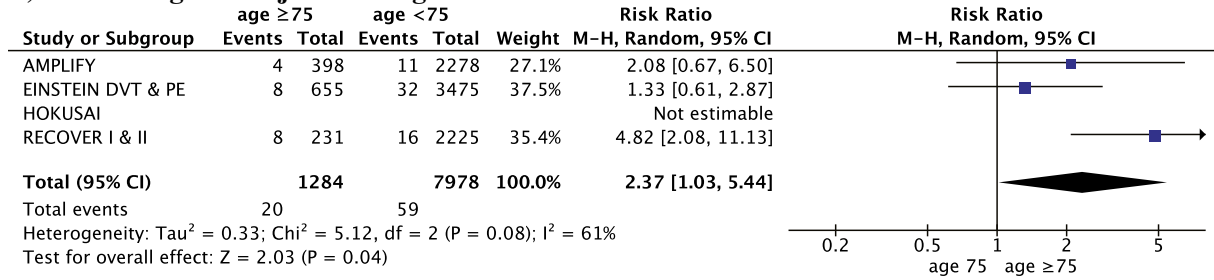

### C) Effect of renal function on major bleeding for VKA

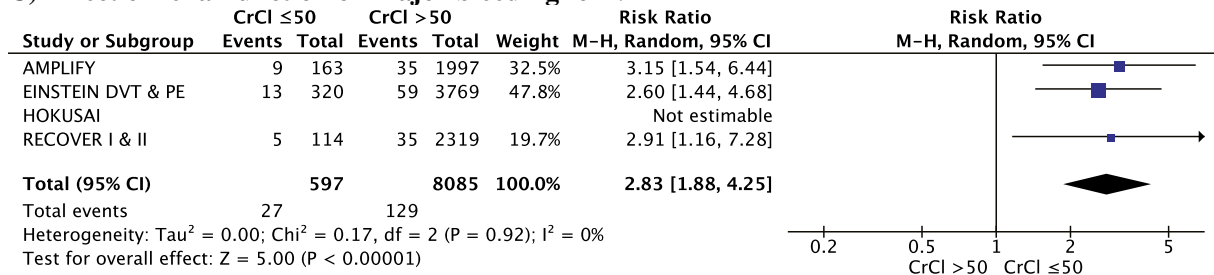

### D) Effect of renal function on major bleeding for NOACs

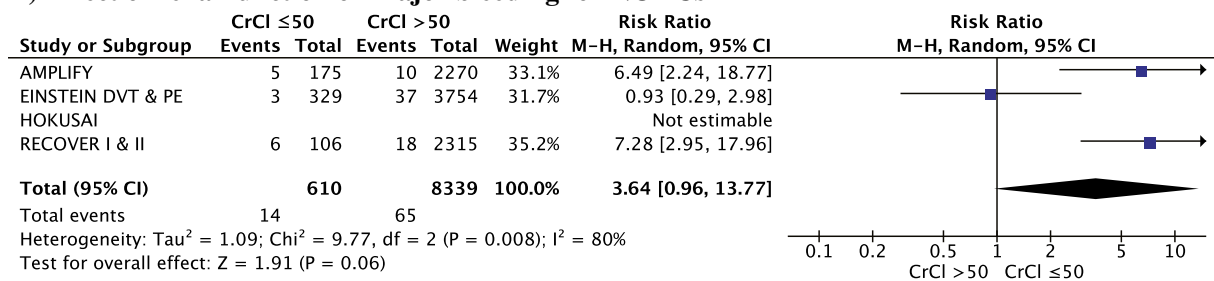

Supplement: MOESM5 [file 9569300]
